# Supplementary material
Source: Springer Nature journal article supplement (https://www.springermedizin.de/resource/supplementary/12882_2012_524_MOESM7_ESM.pdf/9454302)

Sham

Nx

Nx+STG

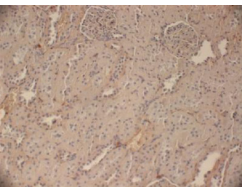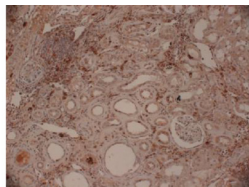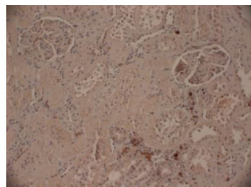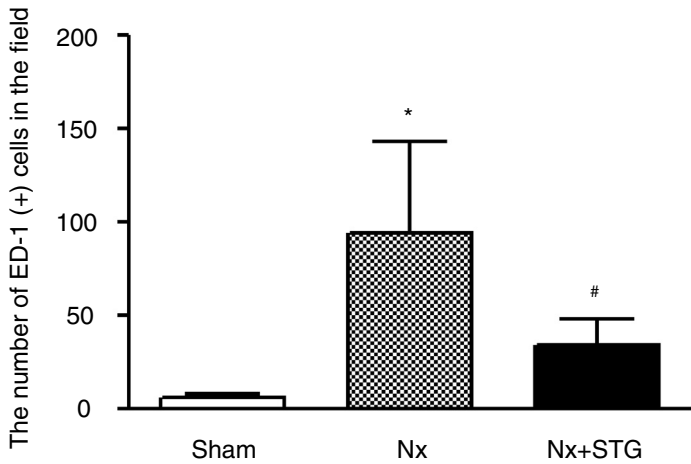

Supplement: MOESM7 [file 9454302]
